# Supplementary material for: Preparation and characterization of microporous carbon spheres from high amylose pea maltodextrin
Source: Royal Society of Chemistry journal article supplement (doi:10.1039/c7ra05343f), 2017-01-01
Supplement: c7ra05343f1.pdf [file c7ra05343f1.pdf]

The composition of the volatile products of flash pyrolysis at 600° C, was investigated with an apparatus composed of a Pyroprobe 1000 (Analytical Inc.) associated to a gas chromatograph GC 5890A (Hewlett Packard) equipped with a mass spectrometer msd 5970 (Hewlett Packard) as detector. The GC separation was performed with a capillary column 5% cross-linked HP5 (30m) while the carrier gas was helium.

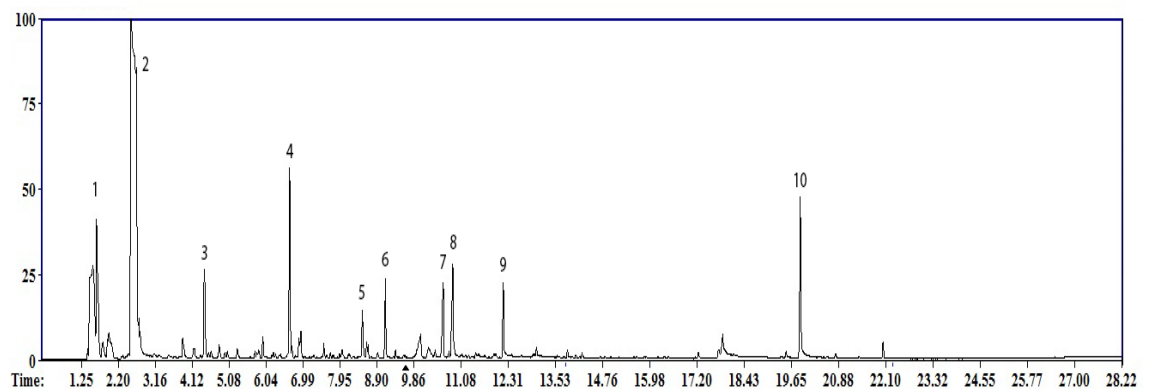

| Peak | Atribution                                                                   |  |
|------|------------------------------------------------------------------------------|--|
| 1    | Carbon dioxide                                                               |  |
| 2    | triethylamine                                                                |  |
| 3    | 2-furancarboxyaldehyde                                                       |  |
| 4    | 5-methyl-2- furancarboxyaldehyde                                             |  |
| 5    | 5-methyl-1,3-benzendiol                                                      |  |
| 6    | maltol                                                                       |  |
| 7    | 1,4:3,6-Dianhydro-.alpha.-d-glucopyranose                                    |  |
| 8    | 5-hydroxymethyl-2- furancarboxyaldehyde                                      |  |
| 9    | 1,3-Isobenzofurandione                                                       |  |
| 10   | 1,9b-Dihydro-1,1-dimethyl-9b-methoxy-5H-pyrrolo[2,1-a]isoindol-2(3H),5-dione |  |
